# Supplementary material for: OnmiMHC: a machine learning solution for UCEC tumor vaccine development through enhanced peptide-MHC binding prediction
Source: Front Immunol. 2025 Feb 28;16:1550252. doi: 10.3389/fimmu.2025.1550252 (PMC11906482; doi:10.3389/fimmu.2025.1550252)
Supplement: Supplementary file 3 [file Supplementaryfile3.xlsx]

## Sheet: pVAC-Seq_predict
Peptide	Label	HLA	Measured BA	MHCflurry Score	MHCnuggetsI Score	NetMHC Score	NetMHCcons Score	NetMHCpan Score	PickPocket Score	SMM Score	SMMPMBEC Score	OmniMHC
TLFMREHNP	1	B0801	6.002	19825.6	1573.98	4250.19	9396.78	7200.63	39408.8	12177.3	9292.45	0.0632085
TLFMREHNK	0	B0801	5.83	18330	24050	17869.1	10757.6	11896.7	41151.8	21955.8	12334.7	0.00978534
PPDVKHSKM	0	B0702	5.737	212.88	4827.49	6243.57	6539.79	4799.82	592.1	990.58	1276.91	0.625908
GDSLLTNMTV	0	A0201	5.593	18622.9	5482.22	6259.4	17410.9	4810.74	12517	26150.5	5392.87	0.0636569
ERAKHACPR	0	A6801	5.505	2043.99	1191.45	926.46	1262.76	6400.41	2722.37	210.13	315.39	0.389647
TLFMNEHNL	0	B0801	5.345	524.99	1845.88	2195.23	3932.89	2599.82	3567.97	7203.61	5384.31	0.42673
TLFMREHNE	0	B0801	5.25	24921.3	533.16	3977.53	8998.77	6493.18	20149.1	3850.79	3420.82	0.0207589
APRVKAMIN	0	B0702	5.209	906.56	1601.22	2294.23	5681.68	2282.7	585.72	2856.87	1459.35	0.444934
ARRVKAMII	0	B0702	5.207	15416.6	21886.4	15758.3	18780.8	15843.8	4242.33	10348.8	11250.2	0.00493271
DPDVKHSKM	0	B0702	5.199	249.15	4392.74	10077.3	8758.62	4410.98	326.55	2167.16	2061.39	0.20784
TLFMVEHNL	0	B0801	5.155	2017.62	2068.99	4724.9	7860.43	4472.3	3236.91	9518.09	7854.71	0.277954
TLFMRIHNL	0	B0801	5.121	44.26	6.82	16.98	23.3	19.01	1904.94	157.24	128.86	0.9936
EKAKHACPR	0	A6801	4.84	1425.66	493.06	659.86	989.9	5075.3	1654.99	115.21	149.92	0.241677
TLDMREHNL	0	B0801	4.821	156.71	1331.06	1757.18	2192.64	1854.88	5441.03	1480.98	1096.81	0.916847
MLRWKQSSV	0	A0201	4.781	263.2	5081.1	309.82	236.04	1002.53	158.17	178.28	180.9	0.897458
TLFMPEHNL	0	B0801	4.58	2022.39	10425.9	10251.8	9706.8	8021.43	3766.31	24521.7	19370	0.24497
GLSLRTNMTV	0	A0201	4.341	222.21	5029.81	183.71	141.95	90.91	145.05	86.59	115.03	0.552845
GLSLKTNMTV	0	A0201	4.156	130.69	4756.72	134.18	103.16	80.27	141.95	75.94	98.36	0.574448
CPILPCFWR	0	A6801	3.895	192.25	438.78	477.94	129.48	433.77	384.09	96.71	80.51	0.455543
NLGLKFRDI	0	B0801	3.887	1287.46	170.91	90.96	137.41	433.83	2812.19	273.87	238.85	0.728889
RADVKHSKM	0	B0702	3.86	568.66	1737.88	4481.36	5099.03	1783.08	1567.83	2064.86	2188.57	0.314499
KLELLQFQV	0	A0201	3.828	42.32	4371.75	61.28	54.78	39.08	36.31	97.97	95.37	0.991243
TQFMREHNL	0	B0801	3.672	121.88	967.8	1213.44	1584.89	484.46	7775.84	4004.52	2260.11	0.826075
GLTLLTNMTV	0	A0201	3.646	158.95	4824.22	127.55	100.41	52.36	165.16	58.95	68.36	0.889563
TKFMREHNL	0	B0801	3.64	1007.77	2946	1089.33	2157.34	910.82	10993	3217.73	1932.55	0.476443
RMSNLQLKV	0	A0201	3.481	27.11	1193.98	61.82	61.37	33.54	55.98	96.63	104.33	0.982726
LLTSMAYDR	0	A6801	3.477	741.75	164.85	173.24	437.34	400.78	792.98	221.05	180.24	0.587115
DQREIISFR	0	A6801	3.443	47.59	453.62	327.27	142.72	112.04	2842.78	222.58	174.92	0.946595
GLSLLTNMTV	0	A0201	3.428	48.96	4558.94	97.43	50.78	45.64	122	47.37	57.12	0.950214
TLGMREHNL	0	B0801	3.364	197.33	124.41	63.55	201.76	234.59	3848.7	633.21	495.6	0.612741
TLFMKEHNL	0	B0801	3.299	74.44	55.7	133.45	324.79	181.09	4288.48	1192.75	865.23	0.989069
ELAKHACPR	0	A6801	3.245	33.73	22.33	35.78	30.87	47.85	456.69	29.61	36.13	0.990187
ELAKKACPR	0	A6801	3.225	42.69	80.74	77.96	79.14	94.73	625.01	48.03	51.86	0.968336
RVDVKHSKM	0	B0702	3.208	1173.74	2857.08	3920.1	4311.75	2017.41	2216.49	1655.35	1816.18	0.472036
LNHASSYMR	0	A6801	3.195	272.15	77.3	103.28	190.11	130.39	1318.61	229.35	221.23	0.943844
TLQKKFGIV	0	B0801	3.181	191.18	41.93	92.25	189.08	216.95	3133.53	537.71	432.64	0.891322
RPDVKQSKM	0	B0702	3.128	53.96	88.35	132.14	75.79	79.71	202.86	118.82	142.94	0.98711
HPQYSRVHI	0	B0702	3.127	48.64	572.06	70.86	22.56	24.28	73.37	103.01	99.12	0.980136
TLFMRCHNL	0	B0801	3.12	56.98	4.84	12.67	22.93	18.59	2216.49	167.32	157.81	0.964229
LPSASTTFF	0	B0702	3.081	102.96	360.44	168.25	104.28	120.5	159.89	127.91	126.52	0.884582
KTGGPIYRR	0	A6801	3.067	56.09	293.08	791.47	508.87	249.71	286.79	474.78	419.61	0.965868
TLIMREHNL	0	B0801	3.029	67.71	70.55	76.95	132.31	86.4	4151.52	712.11	486.55	0.978422
RPDVKHSKF	0	B0702	3.007	67.88	55.51	142.41	95.12	67.21	367.82	162.89	172.25	0.95528
RPDVDHSKM	0	B0702	3.006	83.92	67.05	102.35	80.43	94.66	159.89	108.87	131.27	0.968522
TLFMRDHNL	0	B0801	3.005	81.32	10.82	31.81	56.28	79.66	3529.57	248.63	269.23	0.982464
MPDVKHSKM	0	B0702	2.969	49.9	91.78	171.27	93.08	44.63	109.48	153.78	156.37	0.97785
GILGFVFTL	0	A0201	2.965	19.96	589.25	15.71	13.49	7.27	29.89	48.65	45.75	0.991385
TLFMREHNL	0	B0801	2.918	57.35	16.76	61	95.63	66.68	3567.97	530.33	393.67	0.981076
LPFDKTTVM	0	B0702	2.856	40.95	230.66	119.32	67.28	104.48	110.68	86.28	95.98	0.950155
APRVDAMII	0	B0702	2.837	49.77	50.37	22.45	36.91	29.9	122	63.23	73.31	0.9664
TLFMRFHNL	0	B0801	2.833	44.71	4.25	5.93	8.85	8.44	984.56	49.15	42.38	0.992431
KPDVKHSKM	0	B0702	2.804	56.96	62.02	109.51	107.14	53.87	211.83	195.83	191.5	0.964419
APRVEAMII	0	B0702	2.786	45.97	63.67	25.96	51.61	29.68	135.94	94.82	108.93	0.981196
TMFMREHNL	0	B0801	2.769	53.41	37.73	58.77	66.2	39.11	2523.8	468.33	379.43	0.962469
TLRMREHNL	0	B0801	2.752	40.49	25.73	12.46	19.6	14.61	1235.73	125.76	94.43	0.993156
RPDVKHSKL	0	B0702	2.748	45.91	75.5	29.03	23.3	18.42	194.27	60.66	63.26	0.995859
RPDVHHSKM	0	B0702	2.744	48.12	34.01	16.74	14.63	9.53	116.83	32.35	34.85	0.994158
TLFMREHNM	0	B0801	2.724	102.43	87.42	101.58	201.76	118.6	2936.57	868.06	706.53	0.89796
APRVKAKII	0	B0702	2.688	43.97	29.51	20.47	58.45	56.43	198.52	80.33	81.13	0.977685
RPDVKHSKM	0	B0702	2.685	49.36	27.78	36.82	28.31	20.86	159.89	74.8	80.57	0.989931
APRVKAMII	0	B0702	2.605	41.06	47.4	9.62	24.07	17.58	122	43.44	44.99	0.99228
RPDVEHSKM	0	B0702	2.499	67.89	77.78	137.18	144.27	80.32	178.16	163.26	195.06	0.975033
RPDVRHSKM	0	B0702	2.461	48.17	14.69	17.77	15.45	11.03	135.94	35.15	37.86	0.995129
SWPDGAELPF	0	A2402	2.403	67.7	3225.25	246.26	154.78	282.18	293.06	47.83	59.93	0.836602
LYRENGCMF	0	A2402	2.396	48.96	5051.19	219.3	314.41	158.44	151.47	322.57	217.75	0.835116
RLFQKSKEL	0	B0801	2.386	72.74	105.29	68.04	166.06	216.07	2904.96	327.76	379.43	0.950048
VLYTKVIPM	0	B0801	2.339	106.69	153.97	287.43	209.55	128.76	1158.05	574.84	660.89	0.963945
VWLANHCSI	0	A2402	2.172	88.44	5120.06	189.67	145.84	93.45	209.55	544.04	363.04	0.737198
HYIYIENHF	0	A2402	2.171	31.94	489.93	121.69	98.79	52.24	138.91	255.64	202.75	0.996483
PYIMRRPNF	0	A2402	2.085	90.19	591.82	267.81	628.4	310.85	363.86	191.26	254.66	0.867209
LYYQNGKAF	0	A2402	2.069	48.51	4589.18	287.97	253.23	106.03	211.83	256.82	302.66	0.91569
FLRGRAYGL	0	B0801	2.064	37.91	140.44	8.8	13.57	7.03	218.82	25.97	24.22	0.985239
